# Supplementary material for: HIV-1 persistence following extremely early initiation of antiretroviral therapy (ART) during acute HIV-1 infection: An observational study
Source: PubMed Central journal article supplement (PMC5675377; doi:10.1371/journal.pmed.1002417), 2017-11-07
Supplement: pmed.1002417.s001.pdf [file pmed.1002417.s001.pdf]

STROBE Statement—Checklist of items that should be included in reports of *cohort studies*

|                              | <b>Item No</b> | <b>Recommendation</b>                                                                                                                                                                    |
|------------------------------|----------------|------------------------------------------------------------------------------------------------------------------------------------------------------------------------------------------|
| <b>Title and abstract</b>    | 1              | We have provided in the abstract an informative and balanced summary of what was done and what was found                                                                                 |
| <b>Introduction</b>          |                |                                                                                                                                                                                          |
| Background/rationale         | 2              | The scientific background and rationale for the investigation being reported has been explained                                                                                          |
| Objectives                   | 3              | Specific objectives have been explained                                                                                                                                                  |
| <b>Methods</b>               |                |                                                                                                                                                                                          |
| Study design                 | 4              | Key elements of study design are presented early in the paper                                                                                                                            |
| Setting                      | 5              | The setting and locations, and data collection have been provided                                                                                                                        |
| Participants                 | 6              | The eligibility criteria and the sources and methods of selection of participants have been provided. Follow-up methods have been provided.                                              |
| Variables                    | 7              | Outcomes, exposures, predictors, potential confounders, and effect modifiers have been provided.                                                                                         |
| Data sources/<br>measurement | 8              | Sources of data and details of methods of assessment (measurement) have been provided                                                                                                    |
| Bias                         | 9              | We discuss potential sources of bias                                                                                                                                                     |
| Study size                   | 10             | The study size rationale has been provided                                                                                                                                               |
| Quantitative variables       | 11             | N/A                                                                                                                                                                                      |
| Statistical methods          | 12             | Statistical methods have been described                                                                                                                                                  |
| <b>Results</b>               |                |                                                                                                                                                                                          |
| Participants                 | 13             | Numbers of individuals at each stage of study have been reported                                                                                                                         |
| Descriptive data             | 14             | Characteristics of study participants have been provided when able as well as exposure information<br>Follow-up time has been summarized                                                 |
| Outcome data                 | 15             | Numbers of outcome events have been reported                                                                                                                                             |
| Main results                 | 16             | All results generated from these case reports have been provided in addition to confidence intervals and estimates when applicable                                                       |
| Other analyses               | 17             | All analyses have been reported that have been performed and are pertinent to this study                                                                                                 |
| <b>Discussion</b>            |                |                                                                                                                                                                                          |
| Key results                  | 18             | Key results have been summarized with reference to study objectives                                                                                                                      |
| Limitations                  | 19             | Limitations of the study have been discussed                                                                                                                                             |
| Interpretation               | 20             | A cautious overall interpretation of results have been provided considering objectives, limitations, multiplicity of analyses, results from similar studies, and other relevant evidence |
| Generalisability             | 21             | Generalisability of study results have been discussed                                                                                                                                    |
| <b>Other information</b>     |                |                                                                                                                                                                                          |
| Funding                      | 22             | Sources of funding and the roles of the funders for the present study have been provided                                                                                                 |
