# Supplementary material for: HIV-1 persistence following extremely early initiation of antiretroviral therapy (ART) during acute HIV-1 infection: An observational study
Source: PubMed Central journal article supplement (PMC5675377; doi:10.1371/journal.pmed.1002417), 2017-11-07
Supplement: pmed.1002417.s002.pdf [file pmed.1002417.s002.pdf]

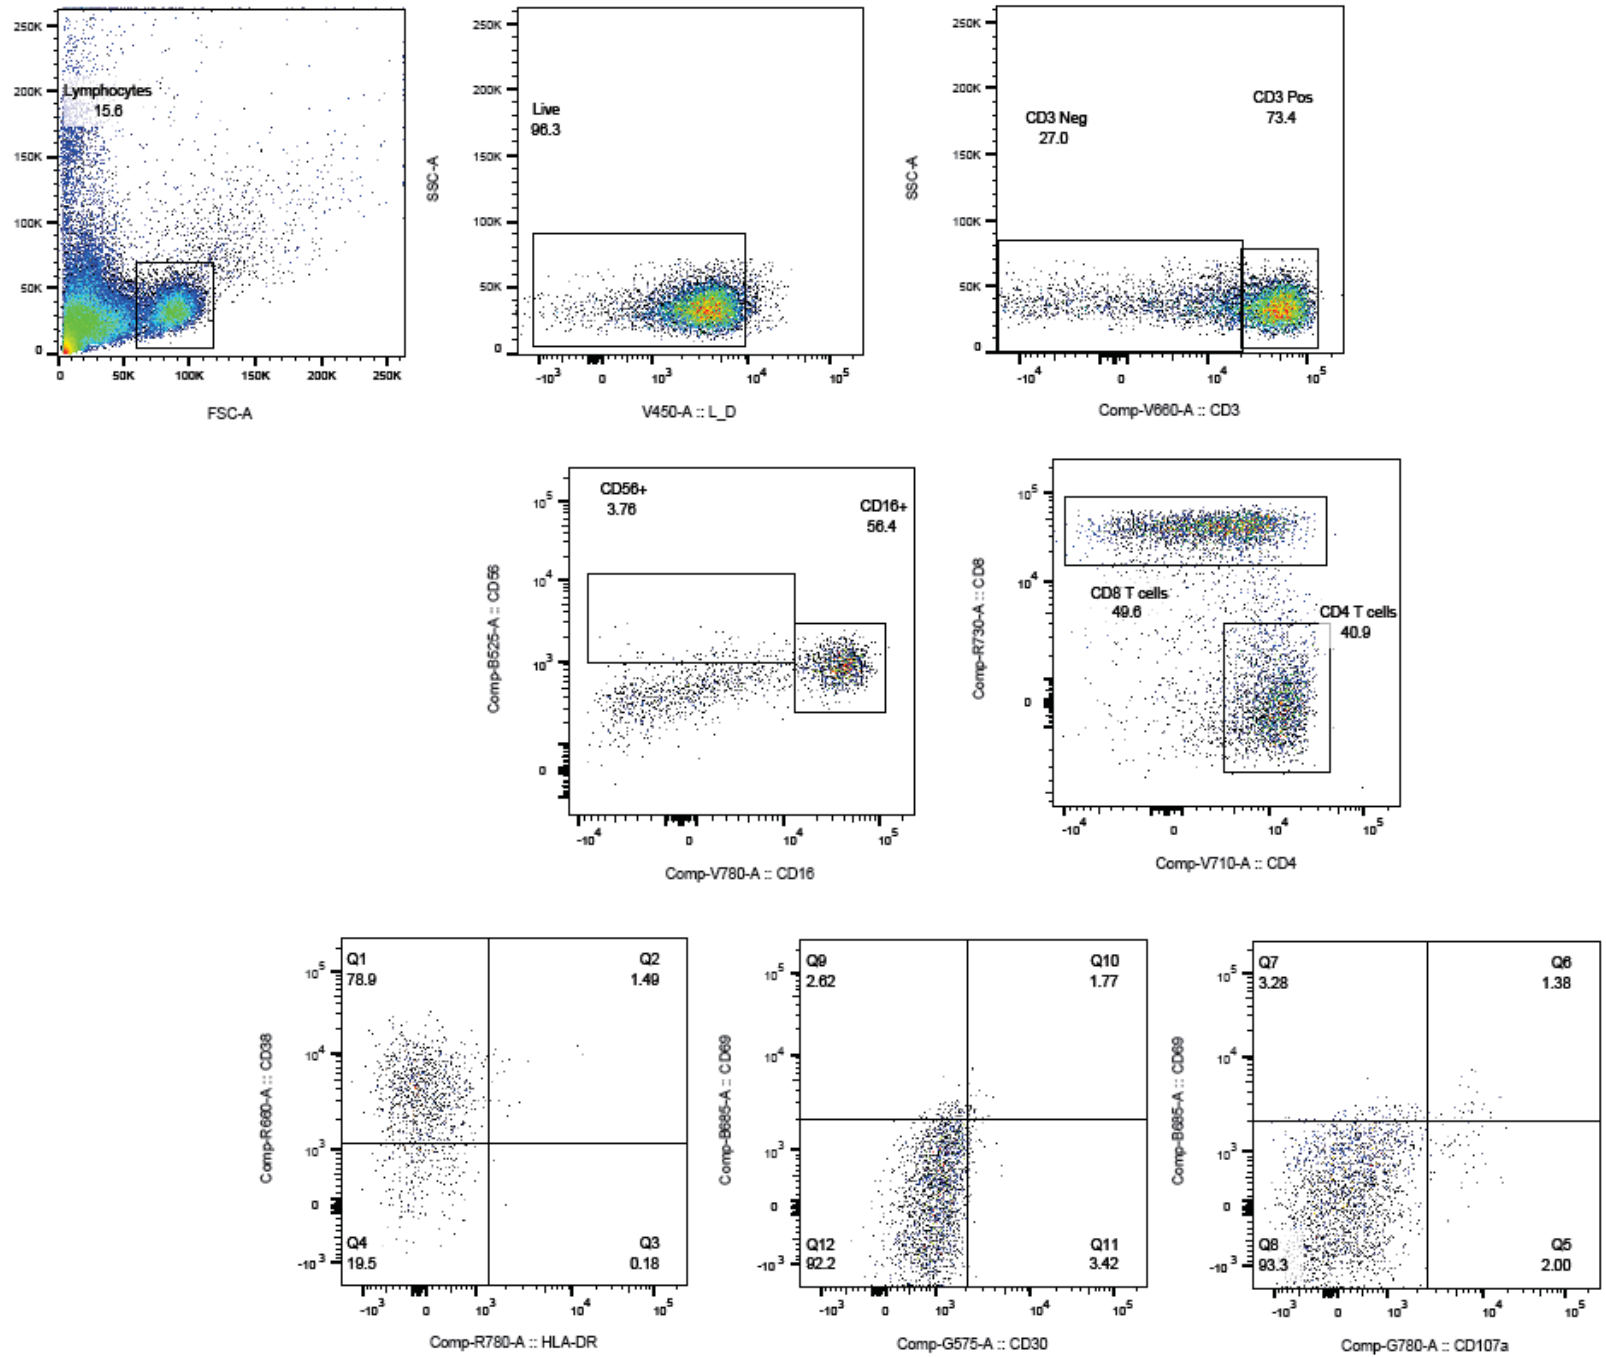

**Fig S1.** Example gating method for CD4+ lymphocyte expression of CD30 and CD69 during analytical treatment interruption.
